# Supplementary material for: Paclitaxel-Eluting versus Uncoated Stents in Primary Percutaneous Coronary Intervention
Source: Atypon-hosted journal article supplement (doi:10.1056/nejmoa062598), 2006-09-13
Supplement: nejm_laarman_1105sa1.pdf [file nejm_laarman_1105sa1.pdf]

## Supplementary Appendix

This appendix has been provided by the authors to give readers additional information about their work.

Supplement to: Laarman GJ, Suttorp MJ, Dirksen MT, et al. Paclitaxel-eluting versus uncoated stents in primary percutaneous coronary intervention. *N Engl J Med* 2006;355:1105-13.

Table 1 Relative risk estimates for endpoint MACE at 30 days.

| Method                                   | PES        |        | BMS        |        | RR     | 95% CI |        | P-value |
|------------------------------------------|------------|--------|------------|--------|--------|--------|--------|---------|
|                                          | Proportion | Rate   | Proportion | Rate   |        | Lower  | Upper  |         |
| KM cumulative 30 day incidence & logrank | --         | 0,0421 | --         | 0,0652 | 0,6465 | 0,3275 | 1,2763 | 0,2120  |
| Ratio of observed proportions            | 13/310     | 0,0419 | 20/309     | 0,0647 | 0,6479 | 0,3300 | 1,2721 | 0,2073  |
| Cox PH model unadjusted                  | --         | --     | --         | --     | 0,6438 | 0,3203 | 1,2943 | 0,2165  |

Table 2 Relative risk estimates for endpoint Death or MI at 30 days.

| Method                                   | PES        |         | BMS        |        | RR     | 95% CI |        | P-value |
|------------------------------------------|------------|---------|------------|--------|--------|--------|--------|---------|
|                                          | Proportion | Rate    | Proportion | Rate   |        | Lower  | Upper  |         |
| KM cumulative 30 day incidence & logrank | --         | 0,03245 | --         | 0,0489 | 0,6641 | 0,3033 | 1,4542 | 0,3075  |
| Ratio of observed proportions            | 10/310     | 0,0323  | 15/309     | 0,0485 | 0,6645 | 0,3049 | 1,4482 | 0,3038  |
| Cox PH model unadjusted                  | --         | --      | --         | --     | 0,6617 | 0,2973 | 1,4728 | 0,3117  |

Table 3 Relative risk estimates for endpoint TLR at 30 days.

| Method                                   | PES        |        | BMS        |        | RR     | 95% CI |        | P-value |
|------------------------------------------|------------|--------|------------|--------|--------|--------|--------|---------|
|                                          | Proportion | Rate   | Proportion | Rate   |        | Lower  | Upper  |         |
| KM cumulative 30 day incidence & logrank | --         | 0,0230 | --         | 0,0300 | 0,7649 | 0,2885 | 2,0278 | 0,6004  |
| Ratio of observed proportions            | 7/310      | 0,0226 | 9/309      | 0,0291 | 0,7753 | 0,2930 | 2,0514 | 0,6081  |
| Cox PH model unadjusted                  | --         | --     | --         | --     | 0,7687 | 0,2863 | 2,0642 | 0,6018  |

Table 4 Relative risk estimates for endpoint Cardiac Death at 30 days.

| Method                                   | PES        |        | BMS        |        | RR     | 95% CI |        | P-value |
|------------------------------------------|------------|--------|------------|--------|--------|--------|--------|---------|
|                                          | Proportion | Rate   | Proportion | Rate   |        | Lower  | Upper  |         |
| KM cumulative 30 day incidence & logrank | --         | 0,0260 | --         | 0,0423 | 0,6139 | 0,2581 | 1,4601 | 0,2701  |
| Ratio of observed proportions            | 8/310      | 0,0258 | 13/309     | 0,0421 | 0,6134 | 0,2601 | 1,4464 | 0,2641  |
| Cox PH model unadjusted                  | --         | --     | --         | --     | 0,6127 | 0,2539 | 1,4781 | 0,2756  |

Table 5 Relative risk estimates for endpoint Death of all causes at 30 days.

| Method                                   | PES        |        | BMS        |        | RR     | 95% CI |        | P-value |
|------------------------------------------|------------|--------|------------|--------|--------|--------|--------|---------|
|                                          | Proportion | Rate   | Proportion | Rate   |        | Lower  | Upper  |         |
| KM cumulative 30 day incidence & logrank | --         | 0,0260 | --         | 0,0423 | 0,6139 | 0,2581 | 1,4601 | 0,2701  |
| Ratio of observed proportions            | 8/310      | 0,0258 | 13/309     | 0,0421 | 0,6134 | 0,2601 | 1,4464 | 0,2641  |
| Cox PH model unadjusted                  | --         | --     | --         | --     | 0,6127 | 0,2539 | 1,4781 | 0,2756  |

Table 6 Relative risk estimates for endpoint recurrent MI at 30 days.

| Method                                   | PES        |        | BMS        |        | RR     | 95% CI |        | P-value |
|------------------------------------------|------------|--------|------------|--------|--------|--------|--------|---------|
|                                          | Proportion | Rate   | Proportion | Rate   |        | Lower  | Upper  |         |
| KM cumulative 30 day incidence & logrank | --         | 0,0066 | --         | 0,0168 | 0,3911 | 0,0764 | 2,0008 | 0,2481  |
| Ratio of observed proportions            | 2/310      | 0,0065 | 5/309      | 0,0162 | 0,3987 | 0,0825 | 1,9275 | 0,2527  |
| Cox PH model unadjusted                  | --         | --     | --         | --     | 0,3937 | 0,0764 | 2,0292 | 0,2652  |

Table 7 Relative risk estimates for endpoint Stent thrombosis at 30 days.

| Method                                   | PES        |        | BMS        |        | RR     | 95% CI |        | P-value |
|------------------------------------------|------------|--------|------------|--------|--------|--------|--------|---------|
|                                          | Proportion | Rate   | Proportion | Rate   |        | Lower  | Upper  |         |
| KM cumulative 30 day incidence & logrank | --         | 0,0066 | --         | 0,0100 | 0,6566 | 0,1105 | 3,9026 | 0,6450  |
| Ratio of observed proportions            | 2/310      | 0,0065 | 3/309      | 0,0097 | 0,6645 | 0,1131 | 3,9055 | 0,6511  |
| Cox PH model unadjusted                  | --         | --     | --         | --     | 0,6586 | 0,1101 | 3,9418 | 0,6474  |

Table 8 Relative risk estimates for endpoint PCI of target lesion at 30 days.

| Method                                   | PES        |        | BMS        |        | RR     | 95% CI |        | P-value |
|------------------------------------------|------------|--------|------------|--------|--------|--------|--------|---------|
|                                          | Proportion | Rate   | Proportion | Rate   |        | Lower  | Upper  |         |
| KM cumulative 30 day incidence & logrank | --         | 0,0066 | --         | 0,0100 | 0,6566 | 0,1105 | 3,9026 | 0,6450  |
| Ratio of observed proportions            | 2/310      | 0,0065 | 3/309      | 0,0097 | 0,6645 | 0,1131 | 3,9055 | 0,6511  |
| Cox PH model unadjusted                  | --         | --     | --         | --     | 0,6586 | 0,1101 | 3,9418 | 0,6474  |

Table 9 Relative risk estimates for endpoint CABG of target vessel at 30 days.

| Method                                   | PES        |        | BMS        |        | RR     | 95% CI |        | P-value |
|------------------------------------------|------------|--------|------------|--------|--------|--------|--------|---------|
|                                          | Proportion | Rate   | Proportion | Rate   |        | Lower  | Upper  |         |
| KM cumulative 30 day incidence & logrank | --         | 0,0197 | --         | 0,0200 | 0,9855 | 0,3214 | 3,0216 | 0,9902  |
| Ratio of observed proportions            | 6/310      | 0,0194 | 6/309      | 0,0194 | 0,9968 | 0,3247 | 3,0595 | 0,9955  |
| Cox PH model unadjusted                  | --         | --     | --         | --     | 0,9930 | 0,3203 | 3,0788 | 0,9902  |

Table 10 Relative risk estimates for endpoint MACE at 1 year.

| Method                                    | PES    |        | BMS    |        | RR     | 95% CI |        | P-value |
|-------------------------------------------|--------|--------|--------|--------|--------|--------|--------|---------|
|                                           |        |        |        |        |        |        |        |         |
| KM cumulative 1-year incidence & logrank  | --     | 0,0879 | --     | 0,1275 | 0,6894 | 0,4328 | 1,0981 | 0,1151  |
| Ratio of observed proportions             | 27/310 | 0,0871 | 39/309 | 0,1262 | 0,6901 | 0,4350 | 1,0948 | 0,1152  |
| Cox PH model unadjusted                   | --     | --     | --     | --     | 0,6759 | 0,4138 | 1,1041 | 0,1177  |
| Cox PH model adjusted for baseline char's | --     | --     | --     | --     | 0,631  | 0,373  | 1,068  | 0,087   |

Table 11 Relative risk estimates for endpoint Death or MI at 1 year.

| Method                                   | PES        |        | BMS        |        | RR     | 95% CI |        | P-value |
|------------------------------------------|------------|--------|------------|--------|--------|--------|--------|---------|
|                                          | Proportion | Rate   | Proportion | Rate   |        | Lower  | Upper  |         |
|                                          |            |        |            |        |        |        |        |         |
| KM cumulative 1-year incidence & logrank | --         | 0,0551 | --         | 0,0717 | 0,7685 | 0,4162 | 1,4190 | 0,3972  |
| Ratio of observed proportions            | 17/310     | 0,0548 | 22/309     | 0,0712 | 0,7702 | 0,4179 | 1,4196 | 0,4027  |
| Cox PH model unadjusted                  | --         | --     | --         | --     | 0,7643 | 0,4059 | 1,4393 | 0,4053  |

Table 12 Relative risk estimates for endpoint TLR at 1 year.

| Method                                   | PES        |        | BMS        |        | RR     | 95% CI |        | P-value |
|------------------------------------------|------------|--------|------------|--------|--------|--------|--------|---------|
|                                          | Proportion | Rate   | Proportion | Rate   |        | Lower  | Upper  |         |
|                                          |            |        |            |        |        |        |        |         |
| KM cumulative 1-year incidence & logrank | --         | 0,0534 | --         | 0,0779 | 0,6853 | 0,3695 | 1,2712 | 0,2281  |
| Ratio of observed proportions            | 16/310     | 0,0516 | 23/309     | 0,0744 | 0,6934 | 0,3750 | 1,2822 | 0,2430  |
| Cox PH model unadjusted                  | --         | --     | --         | --     | 0,6772 | 0,3578 | 1,2819 | 0,2312  |

Table 13 Relative risk estimates for endpoint Cardiac Death at 1 year.

| Method                                   | PES        |        | BMS        |        | RR     | 95% CI |        | P-value |
|------------------------------------------|------------|--------|------------|--------|--------|--------|--------|---------|
|                                          | Proportion | Rate   | Proportion | Rate   |        | Lower  | Upper  |         |
|                                          |            |        |            |        |        |        |        |         |
| KM cumulative 1-year incidence & logrank | --         | 0,0390 | --         | 0,0620 | 0,6295 | 0,3110 | 1,2743 | 0,2000  |
| Ratio of observed proportions            | 12/310     | 0,0387 | 19/309     | 0,0615 | 0,6295 | 0,3130 | 1,2661 | 0,1942  |
| Cox PH model unadjusted                  | --         | --     | --         | --     | 0,6264 | 0,3041 | 1,2903 | 0,2045  |

Table 14 Relative risk estimates for endpoint Death of all causes at 1 year.

| Method                                   | PES        |        | BMS        |        | RR     | 95% CI |        | P-value |
|------------------------------------------|------------|--------|------------|--------|--------|--------|--------|---------|
|                                          | Proportion | Rate   | Proportion | Rate   |        | Lower  | Upper  |         |
| KM cumulative 1-year incidence & logrank | --         | 0,0456 | --         | 0,0652 | 0,6993 | 0,3598 | 1,3590 | 0,2955  |
| Ratio of observed proportions            | 14/310     | 0,0452 | 20/309     | 0,0647 | 0,6977 | 0,3603 | 1,3512 | 0,2858  |
| Cox PH model unadjusted                  | --         | --     | --         | --     | 0,6935 | 0,3503 | 1,3730 | 0,2936  |

Table 15 Relative risk estimates for endpoint recurrent MI at 1 year.

| Method                                   | PES        |        | BMS        |        | RR     | 95% CI |        | P-value |
|------------------------------------------|------------|--------|------------|--------|--------|--------|--------|---------|
|                                          | Proportion | Rate   | Proportion | Rate   |        | Lower  | Upper  |         |
| KM cumulative 1-year incidence & logrank | --         | 0,0167 | --         | 0,0202 | 0,8288 | 0,1285 | 5,3446 | 0,7424  |
| Ratio of observed proportions            | 5/310      | 0,0161 | 6/309      | 0,0194 | 0,8306 | 0,2564 | 2,6911 | 0,7570  |
| Cox PH model unadjusted                  | --         | --     | --         | --     | 0,8198 | 0,2502 | 2,6862 | 0,7428  |

Table 16 Relative risk estimates for endpoint Stent thrombosis at 1 year.

| Method                                   | PES        |        | BMS        |        | RR     | 95% CI |        | P-value |
|------------------------------------------|------------|--------|------------|--------|--------|--------|--------|---------|
|                                          | Proportion | Rate   | Proportion | Rate   |        | Lower  | Upper  |         |
| KM cumulative 1-year incidence & logrank | --         | 0,0100 | --         | 0,0100 | 0,9983 | 0,2030 | 4,9083 | 0,9862  |
| Ratio of observed proportions            | 3/310      | 0,0097 | 3/309      | 0,0097 | 0,9968 | 0,2025 | 4,9068 | 0,9968  |
| Cox PH model unadjusted                  | --         | --     | --         | --     | 0,9855 | 0,1989 | 4,8827 | 0,9857  |

Table 17 Relative risk estimates for endpoint endpoint PCI of target lesion at 1 year.

| Method                                   | PES        |        | BMS        |        | RR     | 95% CI |        | P-value |
|------------------------------------------|------------|--------|------------|--------|--------|--------|--------|---------|
|                                          | Proportion | Rate   | Proportion | Rate   |        | Lower  | Upper  |         |
| KM cumulative 1-year incidence & logrank | --         | 0,0202 | --         | 0,0342 | 0,5912 | 0,2176 | 1,6062 | 0,2927  |
| Ratio of observed proportions            | 6/310      | 0,0194 | 10/309     | 0,0324 | 0,5981 | 0,2225 | 1,6077 | 0,3082  |
| Cox PH model unadjusted                  | --         | --     | --         | --     | 0,5845 | 0,2124 | 1,6083 | 0,2984  |

Table 18 Relative risk estimates for endpoint CABG of target vessel at 1 year.

| Method                                   | PES        |        | BMS        |        | RR     | 95% CI |        | P-value |
|------------------------------------------|------------|--------|------------|--------|--------|--------|--------|---------|
|                                          | Proportion | Rate   | Proportion | Rate   |        | Lower  | Upper  |         |
| KM cumulative 1-year incidence & logrank | --         | 0,0333 | --         | 0,0508 | 0,6556 | 0,2993 | 1,4360 | 0,3008  |
| Ratio of observed proportions            | 10/310     | 0,0323 | 15/309     | 0,0485 | 0,6645 | 0,3049 | 1,4482 | 0,3038  |
| Cox PH model unadjusted                  | --         | --     | --         | --     | 0,6576 | 0,2954 | 1,4637 | 0,3045  |
